# Supplementary material for: Random Saturation Mutagenesis to Generate Highly Diverse Libraries for Directed Evolution
Source: Research Square preprint supplement (doi:10.21203/rs.3.rs-5583255/v1), 2025-01-24
Supplement: Supplementary file 1 [file 7f2a8833faad9f1afafbb364.docx]

## Extended Data for

**Random Saturation Mutagenesis to Generate Highly Diverse Libraries for Directed Evolution**

Xinge Diana Zhang1†, Anqi Chen1†, Liyin Chen1, Rohan Thakur1,2, Perry Ellis1, Yi Xiao1, Milos Milcic3, David A. Weitz1,4,5*, Karla Milcic1,4,6*

1John A. Paulson School of Engineering and Applied Sciences, Harvard University, Cambridge, MA 02138, USA

2Harvard-Massachusetts Institute of Technology Division of Health Sciences and Technology, Massachusetts Institute of Technology, Cambridge, Massachusetts 02139, USA

3University of Belgrade-Faculty of Chemistry, Studentski trg 12–16, 11000 Belgrade, Serbia

4Wyss Institute for Biologically Inspired Engineering, Harvard University, 3 Blackfan Circle, Boston, MA 02115, USA

5Department of Physics, Harvard University, Cambridge, MA 02138 (USA)

6BioSense Institute, University of Novi Sad, Dr Zorana Djindjica 1, Novi Sad 21000, Serbia

†These authors contributed equally to this work

Corresponding authors:

Dr David A. Weitz

E-mail: [weitz@seas.harvard.edu](mailto:weitz@seas.harvard.edu)

Dr Karla Milcic

E-mail: [kilicdurdic@seas.harvard.edu](mailto:kilicdurdic@seas.harvard.edu)

**
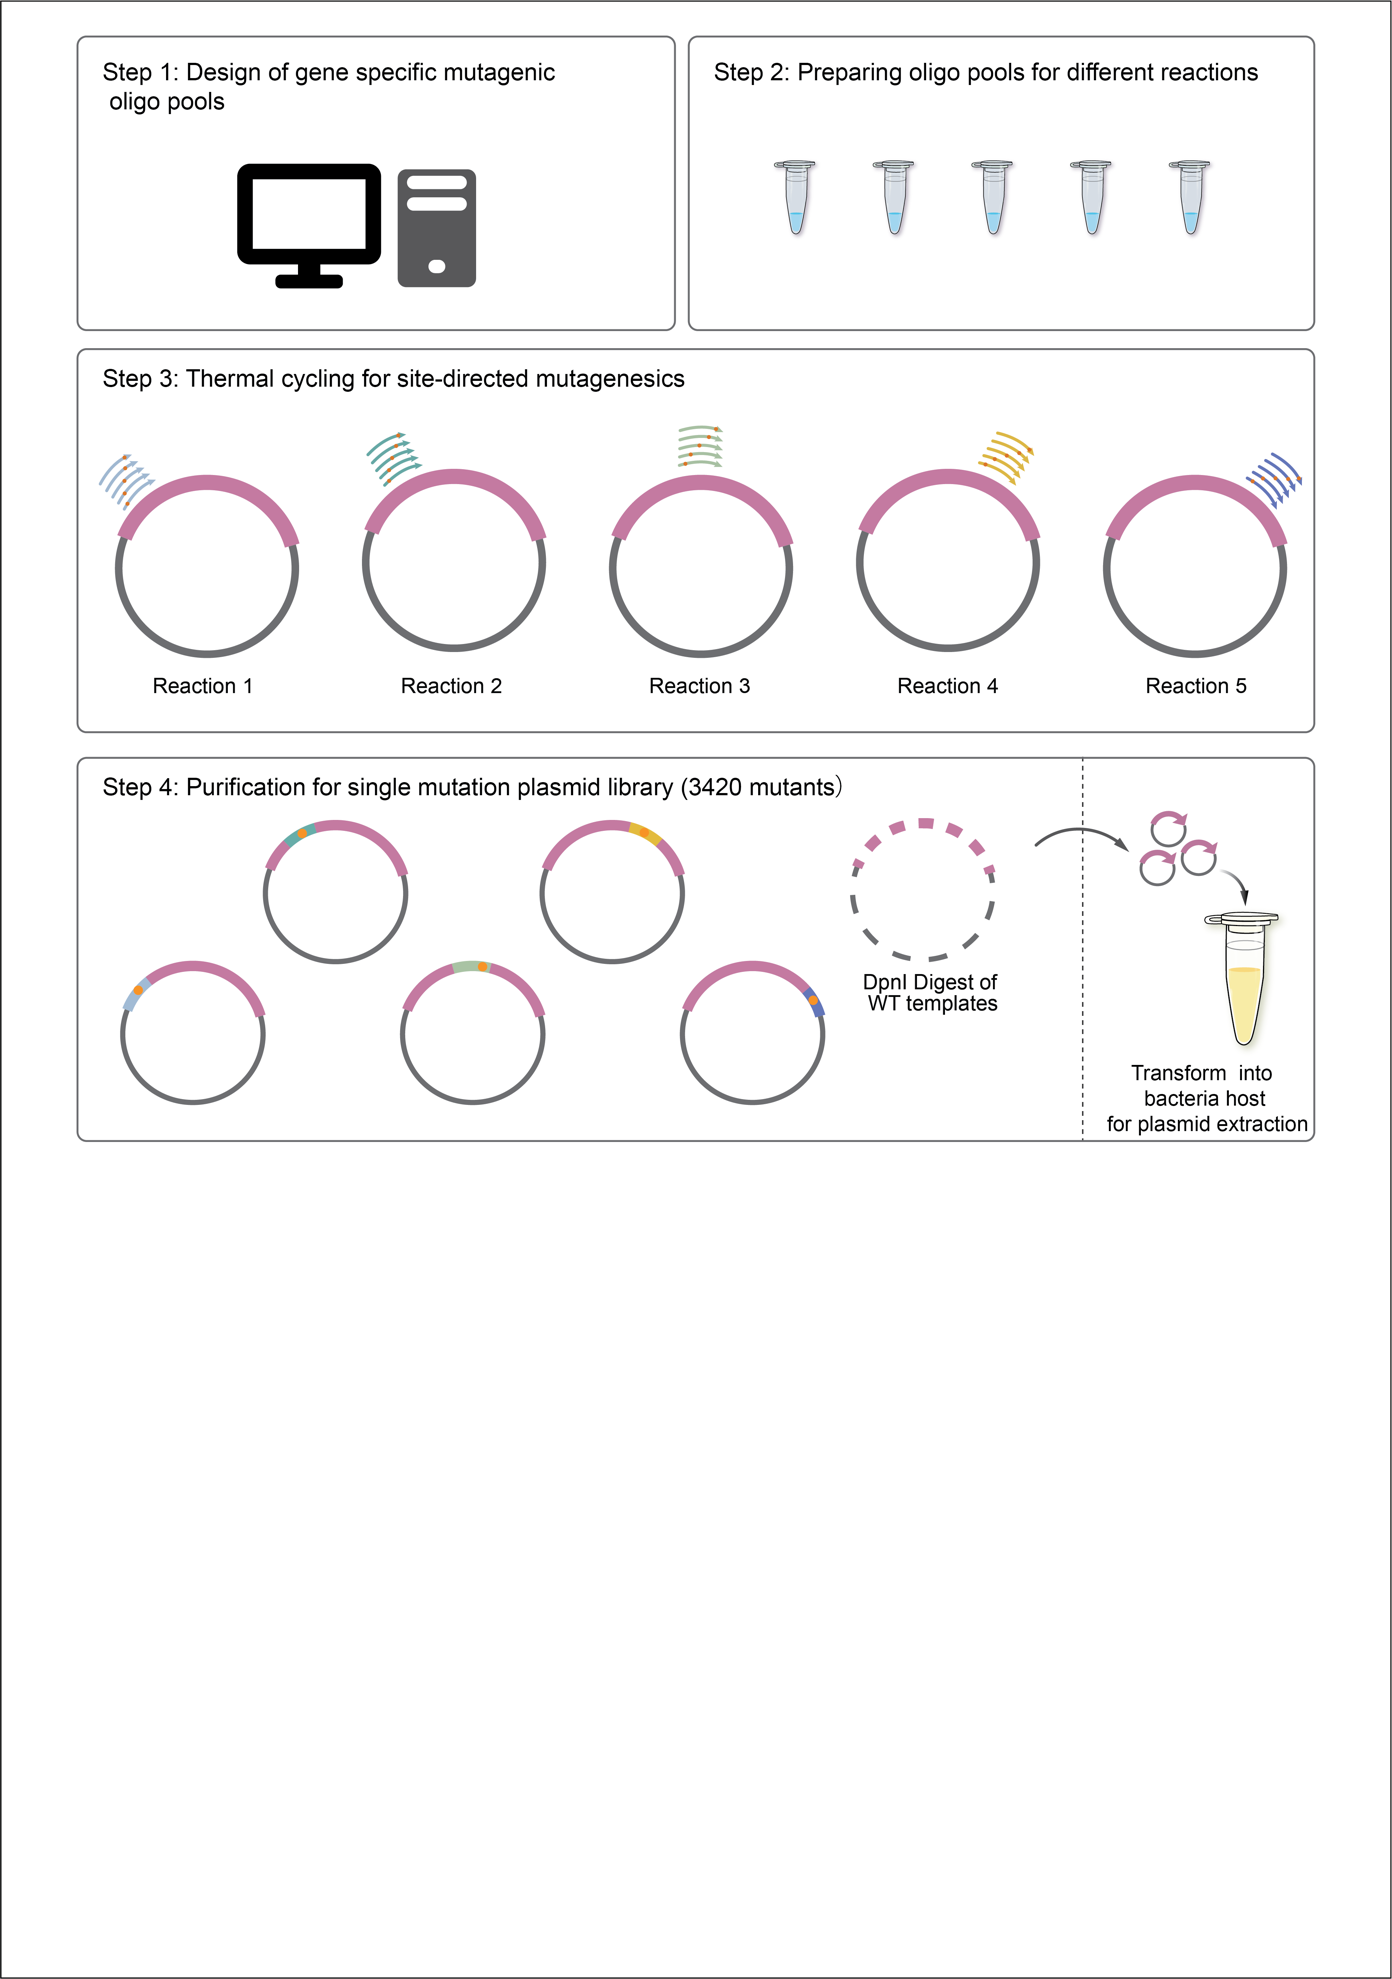
**

**Extended Data Figure 1. Workflow for constructing a single site-saturation mutagenesis library.** The process involves four main steps: Step 1, design of gene-specific mutagenic oligo pools using computational tools; Step 2, preparation of oligo pools for different reactions; Step 3, thermal cycling to introduce site-directed mutations across multiple reactions; and Step 4, purification of the plasmid library, yielding 3,420 unique mutants. Following DpnI digestion to remove wild-type templates, the mutated plasmids are transformed into a bacterial host for plasmid extraction.


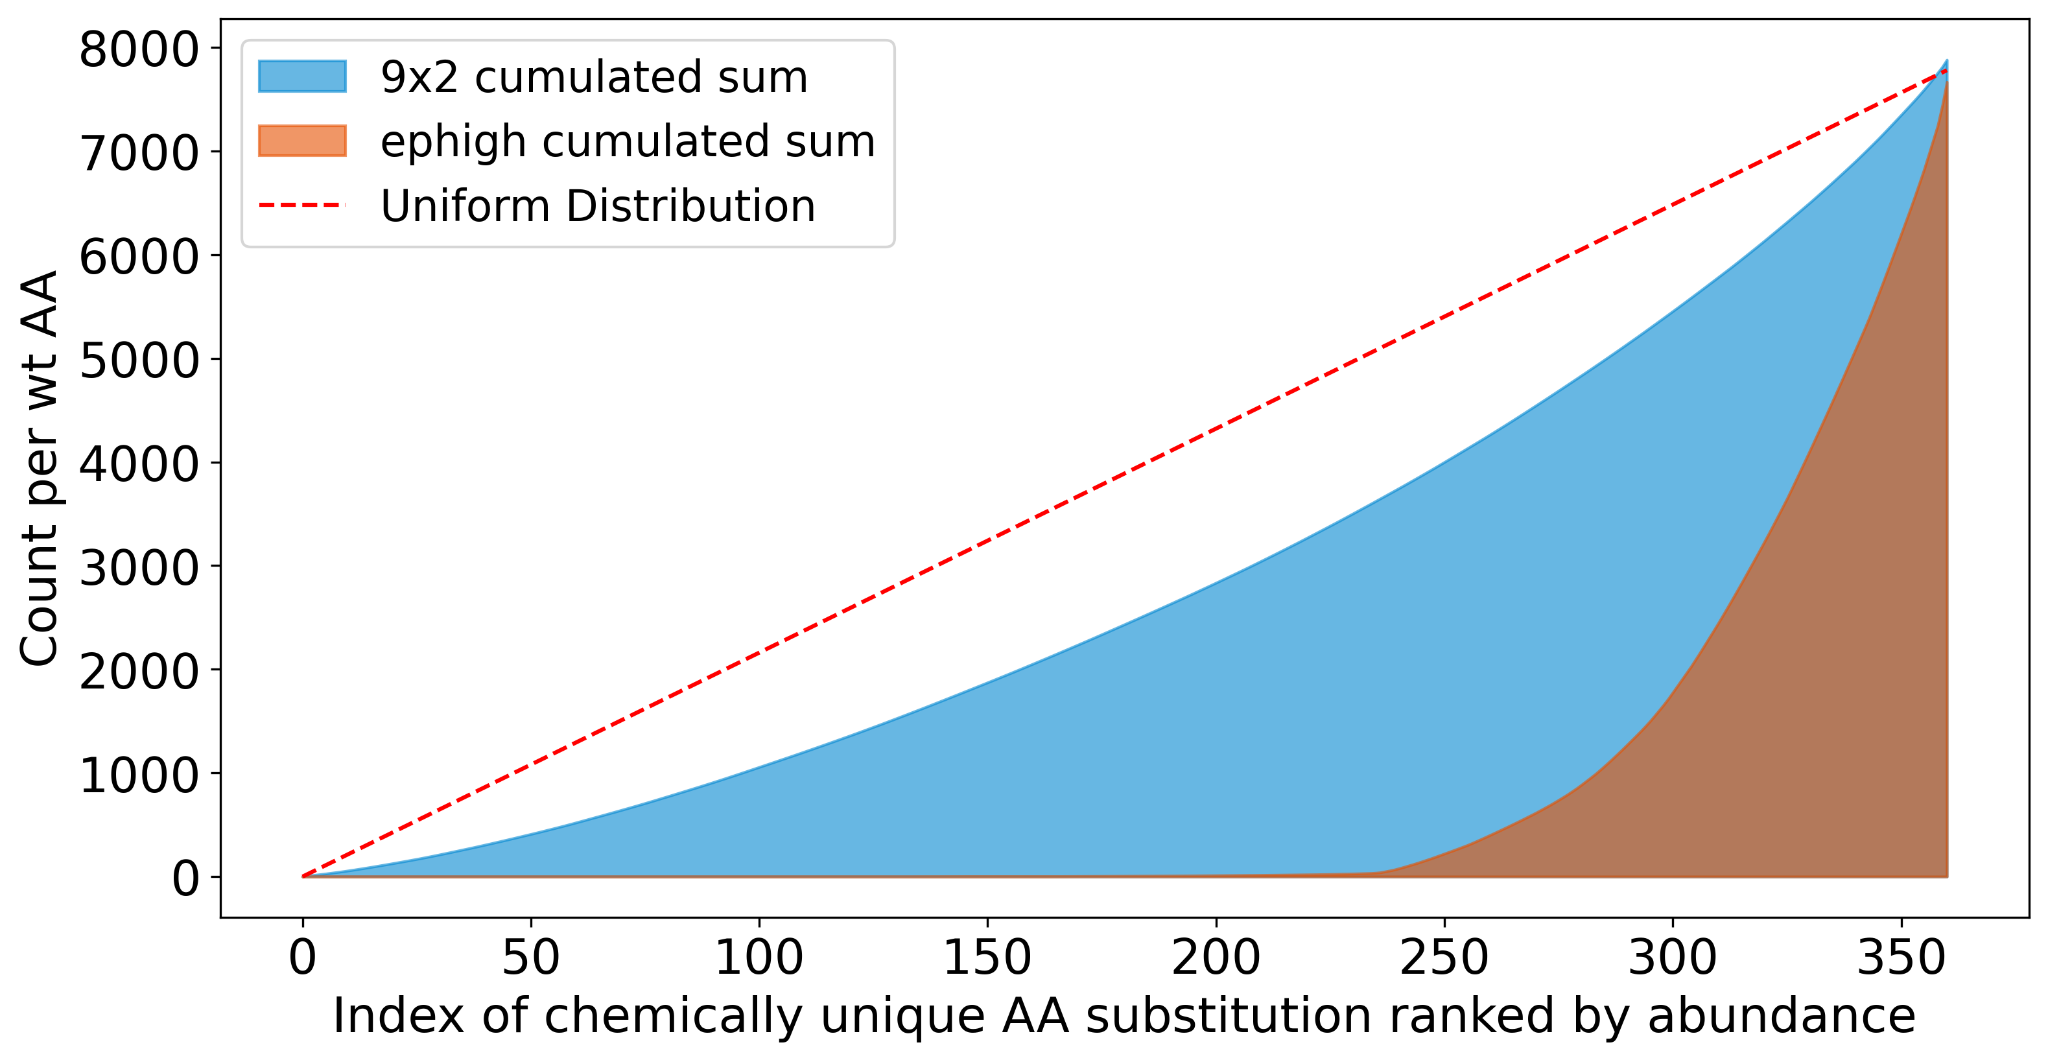


**Extended Data Figure 2. Gini coefficient analysis of amino acid substitution abundance in two libraries.** The cumulative distribution of chemically unique amino acid (AA) substitutions in the 9x2 (blue) and EPhigh (orange) libraries is compared to a uniform distribution (red dashed line). The area between each curve and the uniform distribution reflects the inequality in substitution abundance. The lower Gini coefficient for the 9x2 library indicates a more even distribution of substitutions compared to the EPhigh library.

**Extended Data Table 1. Reported BsLipA variants exhibiting resistance to thermal aggregation.** M134 and M137 substitutions are labeled in red. None of these substitutions can be achieved by only one nucleotide change in the methionine codon.

| Variant name | AA substitutions | Mutagenesis trajectory | T50 (°C) | Publication |
| --- | --- | --- | --- | --- |
| 5-A | A15S, F17S, A20E, N89Y, G111D, L114P, A132D, M134E, I157M, N166Y | epPCRx2, recombinationx1, epPCRx1,  recombinationx1, epPCRx1, recombinationx1, site saturation mutagenesis x1 | 93 | Ahmad, 2009 |
| 5-B | A15S, F17S, A20E, N89Y, G111D, L114P, A132D, M137P, I157M, N166Y | epPCRx2, recombinationx1, epPCRx1,  recombinationx1, epPCRx1, recombinationx1, site saturation mutagenesis x1 | 93 | Ahmad, 2009 |
| 6-B | A15S, F17S, A20E, N89Y, G111D, L114P, A132D, M134E, M137P, I157M, S163P, N166Y | epPCRx2, recombinationx1, epPCRx1,  recombinationx1, epPCRx1, recombinationx1, site saturation mutagenesis x1,  recombinationx1 | 63 | Zahid Kamal, 2011 |
| Variant IX | K112D, M134D, Y139C, I157M | Structural-based position prediction (B-FIT),  iterative saturation mutagenesisx4 | 62.8 | Reetz, Angewandte, 2006 |
| Variant X | R33Q,D34N, K35D, K112D, M134D, Y139C, I157M | Structural-based position prediction (B-FIT),  iterative saturation mutagenesisx5 | 89 | Reetz, Angewandte, 2006; Nature protocol, 2007 |
| Variant XI | R33G, K112D, M134D, Y139C, I157M | Structural-based position prediction (B-FIT),  iterative saturation mutagenesisx5 | 93 | Reetz, Angewandte, 2006; Nature protocol, 2007 |
| MT5 | F17T, M134E, I135E, M137D, Y139D, G158D, N174S | RSMx1 | >95 | This work |
| MT20 | F17G, M134P, M137A, Y139S, R142M, S163P, N174S | RSMx1 | >95 | This work |
